# Supplementary material
Source: PubMed Central journal article supplement (PMC4095974)
Supplement: NIHMS594291-supplement-supplement_1.pdf [file NIHMS594291-supplement-supplement_1.pdf]

## Supplementary Information

### **Hepatocyte-specific ablation of *Foxa2* alters bile acid homeostasis and results in ER stress.**

Irina M. Bochkis, Nir E. Rubins, Peter White, Emma E. Furth, Joshua R. Friedman,  
Klaus H. Kaestner

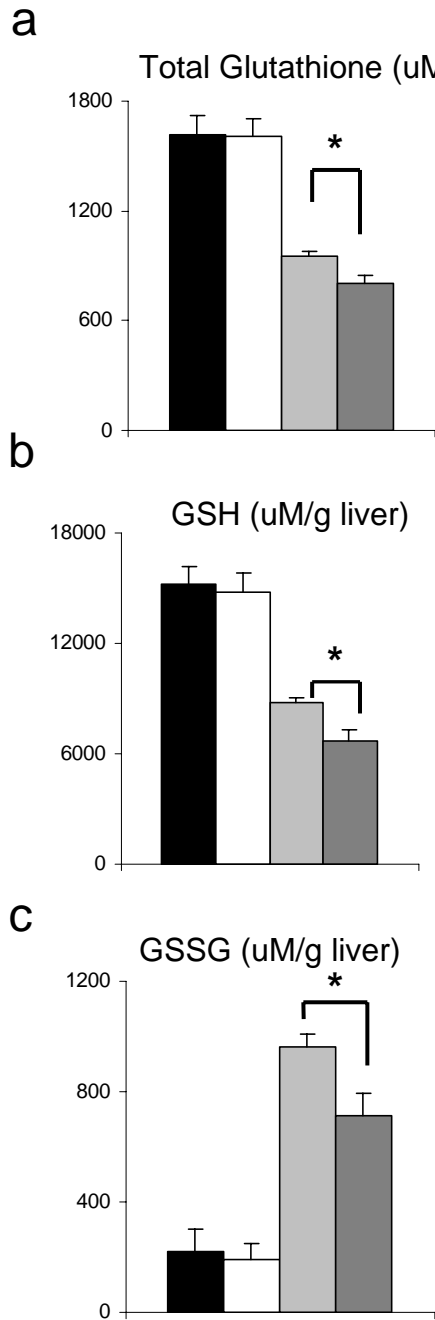

**Supplementary Figure 1** *Foxa2* affects hepatic glutathione metabolism.

(a) Total hepatic glutathione content, as well as the reduced (GSH) (b) and oxidized (GSSG) (c) fraction, was measured in livers of wild-type and *Foxa2*-deficient mice. While glutathione levels do not differ in control and *Foxa2*<sup>loxP/loxP</sup>*Alfp.Cre* mice on standard chow, all forms of hepatic glutathione (total, GSH, and GSSG) are significantly reduced in *Foxa2* mutants on cholic acid diet as compared to wildtype controls. The levels of oxidized glutathione, GSSG, are elevated in both groups with cholic acid feeding, but to a lesser extent in *Foxa2*<sup>loxP/loxP</sup>*Alfp.Cre* mice.

**Supplementary Table 1.** Genome wide location analysis targets of Foxa2 in the liver.

Labeled DNA samples were hybridized to two arrays, the Mouse PromoterChip BCBC-5A and the Mouse PromoterChip BCBC-5B. Together, the two chips contain over 35,000 genomic elements, including promoter elements corresponding to over 20,000 genes, enhancers, microRNA regions, and highly conserved genomic regions. The Mouse PromoterChip BCBC-5A is comprised of 18,000 proximal and distal promoter regions, represented by either a 1 kb or 2 kb tile. All potential regulatory regions on the BCBC-5B chip are represented by a 1kb tile. Statistical analysis of the microarray data was performed using the significance of microarrays (SAM) package with a false discovery rate (FDR) of 10% and fold change cutoff of 1.4.

| ID      | Name                  | Fold Change | FDR (%) | RefSeq      | Entrez Gene Symbol | Entrez Gene ID |
|---------|-----------------------|-------------|---------|-------------|--------------------|----------------|
| P208056 | 0610038K03Rik         | 1.75        | 0.0     | NM_026701   | 0610038K03Rik      | 68371          |
| P200984 | 1110007F12Rik         | 2.78        | 0.0     | NM_197986   | 1110007F12Rik      | 68487          |
| P208603 | 1110008J03Rik         | 1.44        | 0.2     | NM_029096   | 1110008J03Rik      | 100764         |
| P208090 | 1110012L19Rik         | 2.12        | 0.0     | NM_026787   | 1110012L19Rik      | 68618          |
| P221498 | ENHANCER:NM_025370    | 1.57        | 0.0     | NM_025370   | 1110018J18Rik      | 66129          |
| P223186 | ENHANCER:NM_027872    | 2.77        | 0.0     | NM_027872   | 1200006F02Rik      | 71706          |
| P215972 | ENHANCER:NM_027905    | 1.49        | 1.0     | NM_027905   | 1300018J18Rik      | 223776         |
| P208948 | 1500005A01Rik         | 1.69        | 0.1     | NM_033146   | 1500005A01Rik      | 85308          |
| P225609 | PROMOTER:NM_028056    | 1.48        | 0.9     | NM_028056   | 1600002H07Rik      | 72016          |
| P216013 | ENHANCER:NM_028166    | 2.41        | 0.0     | NM_028166   | 1600014C10Rik      | 72244          |
| P101568 | 1600020H07Rik         | 1.67        | 0.2     | NM_019975   | 1600020H07Rik      | 56794          |
| P206861 | 1600020H07Rik         | 1.77        | 0.0     | NM_019975   | 1600020H07Rik      | 56794          |
| P208612 | 1700009J07Rik         | 1.71        | 0.0     | NM_029200   | 1700009J07Rik      | 75188          |
| P219457 | ENHANCER:NM_028491    | 1.90        | 0.0     | NM_028491   | 1700040L02Rik      | 73287          |
| P209820 | 1810023F06Rik         | 1.45        | 1.5     | NM_145449   | 1810023F06Rik      | 217845         |
| P223084 | ENHANCER:NM_025604    | 1.46        | 0.5     | NM_025604   | 1810042K04Rik      | 66506          |
| P203324 | 1810048P08Rik         | 1.93        | 0.0     | NM_133717   | 1810048P08Rik      | 69834          |
| P209488 | 2010002N04Rik         | 1.56        | 0.2     | NM_134133   | 2010002N04Rik      | 106878         |
| P200262 | 2010016F14Rik         | 1.42        | 5.5     | NM_010039   | 2010016F14Rik      | 68009          |
| P206860 | 2310015I08Rik         | 1.61        | 0.1     | NM_019974   | 2310015I08Rik      | 56538          |
| P220290 | PROMOTER:NM_178027    | 2.04        | 0.0     | NM_178027   | 2310075A12Rik      | 69091          |
| P215741 | ENHANCER:NM_026527    | 1.45        | 0.0     | NM_026527   | 2510006C20Rik      | 68044          |
| P106227 | 2610042O14Rik         | 1.40        | 0.1     | NM_025575   | 2610042O14Rik      | 66460          |
| P215571 | ENHANCER:NM_026013    | 1.75        | 0.0     | NM_026013   | 2610318G18Rik      | 67171          |
| P216039 | ENHANCER:NM_028308    | 1.65        | 0.0     | NM_028308   | 2700078K21Rik      | 101513         |
| P106351 | 2810417H13Rik         | 1.52        | 0.0     | NM_026515   | 2810417H13Rik      | 68026          |
| P207763 | 2810443J12Rik         | 1.47        | 0.0     | NM_026044   | 2810443J12Rik      | 67228          |
| P224928 | PROMOTER:NM_001007570 | 1.68        | 0.0     | NM_00100757 | 2900084M01Rik      | 73095          |

|         |                       |      |     |              |               |        |
|---------|-----------------------|------|-----|--------------|---------------|--------|
|         |                       |      |     | 0            |               |        |
| P207586 | 3110001A13Rik         | 1.53 | 0.0 | NM_025626    | 3110001A13Rik | 66540  |
| P101924 | 3230401D17Rik         | 1.44 | 0.0 | NM_025699    | 3230401D17Rik | 66680  |
| P221186 | PROMOTER:NM_173767    | 1.49 | 0.5 | NM_173767    | 3830422K02Rik | 233752 |
| P208273 | 4632415L05Rik         | 1.48 | 1.1 | NM_027561    | 4632415L05Rik | 70808  |
| P222929 | ENHANCER:NM_026594    | 1.47 | 1.1 | NM_026594    | 4930517K11Rik | 68172  |
| P220400 | ENHANCER:NM_029236    | 1.42 | 0.0 | NM_029236    | 4930556P03Rik | 75284  |
| P219707 | ENHANCER:NM_029013    | 2.13 | 0.0 | NM_029013    | 4933428M03Rik | 74589  |
| P200689 | 5330414O08Rik         | 1.53 | 0.0 | NM_183270    | 5330414O08Rik | 68185  |
| P101921 | 5730449L18Rik         | 1.43 | 0.6 | NM_025677    | 5730449L18Rik | 66637  |
| P101922 | 5730521E12Rik         | 1.46 | 0.0 | NM_025684    | 5730521E12Rik | 66650  |
| P209975 | 8430408G22Rik         | 1.49 | 0.0 | NM_145980    | 8430408G22Rik | 213393 |
| P207858 | 9130427A09Rik         | 1.80 | 0.0 | NM_026240    | 9130427A09Rik | 107022 |
| P200713 | 9330169L03Rik         | 1.46 | 0.6 | NM_175253    | 9330169L03Rik | 77226  |
| P217555 | ENHANCER:NM_176838    | 1.47 | 0.4 | NM_176838    | 9530027K23Rik | 77411  |
| P203465 | A030009B12Rik         | 1.63 | 0.1 | NM_026588    | A030009B12Rik | 68159  |
| P201781 | A830093M07            | 1.46 | 1.1 | NM_177843    | A830093M07    | 329436 |
| P203151 | A930025J12Rik         | 1.43 | 0.9 | NM_173734    | A930025J12Rik | 211499 |
| P201764 | Aacs                  | 1.50 | 0.0 | NM_030210    | Aacs          | 78894  |
| P206362 | Aass                  | 1.44 | 1.5 | NM_013930    | Aass          | 30956  |
| P104912 | Abca1                 | 1.43 | 0.6 | NM_013454    | Abca1         | 11303  |
| P223618 | ENHANCER:NM_022419    | 1.43 | 0.0 | NM_022419    | Abhd8         | 64296  |
| P104005 | Acaa1                 | 1.40 | 0.7 | NM_130864    | Acaa1         | 113868 |
| P104270 | Acsl1                 | 1.51 | 0.0 | NM_007981    | Acsl1         | 14081  |
| P102130 | Adfp                  | 1.40 | 0.7 | NM_007408    | Adfp          | 11520  |
| P204056 | Afmid                 | 1.44 | 0.4 | NM_027827    | Afmid         | 71562  |
| P101287 | Ahcy                  | 1.43 | 0.0 | NM_016661    | Ahcy          | 269378 |
| P206144 | Ahsg                  | 2.41 | 0.0 | NM_013465    | Ahsg          | 11625  |
| P225740 | PROMOTER:NM_001012310 | 1.42 | 0.6 | NM_001012310 | Al132487      | 104910 |
| P200901 | Al450540              | 1.43 | 0.3 | NM_145505    | Al450540      | 226252 |
| P216574 | ENHANCER:NM_133840    | 1.45 | 0.0 | NM_133840    | Al462438      | 98985  |
| P224471 | PROMOTER:NM_198027    | 1.49 | 0.0 | NM_198027    | Al839550      | 233065 |
| P214956 | ENHANCER:NM_021299    | 2.23 | 0.0 | NM_021299    | Ak3           | 56248  |
| P100642 | Akt1                  | 1.60 | 0.0 | NM_009652    | Akt1          | 11651  |
| P204051 | Akt1                  | 1.51 | 0.0 | NM_009652    | Akt1          | 11651  |
| P101165 | Aldh1a1               | 1.58 | 0.0 | NM_013467    | Aldh1a1       | 11668  |
| P104030 | Aldh6a1               | 3.05 | 0.0 | NM_134042    | Aldh6a1       | 104776 |
| P209444 | Aldh6a1               | 2.65 | 0.0 | NM_134042    | Aldh6a1       | 104776 |
| P104050 | Aldob                 | 1.46 | 0.1 | NM_144903    | Aldob         | 230163 |
| P102137 | Ambp                  | 1.61 | 0.0 | NM_007443    | Ambp          | 11699  |
| P101089 | Amfr                  | 3.26 | 0.0 | NM_011787    | Amfr          | 23802  |
| P100648 | Amy2                  | 1.43 | 0.6 | NM_009669    | Amy2          | 11723  |
| P101414 | Ap3m1                 | 1.43 | 0.0 | NM_018829    | Ap3m1         | 55946  |
| P102686 | Ap3s1                 | 2.16 | 0.0 | NM_009681    | Ap3s1         | 11777  |
| P207011 | Ap4m1                 | 2.84 | 0.0 | NM_021392    | Ap4m1         | 11781  |
| P103997 | Apoa5                 | 1.94 | 0.0 | NM_080434    | Apoa5         | 66113  |
| P106583 | Apoc1                 | 1.82 | 0.4 | NM_007469    | Apoc1         | 11812  |
| P104583 | Apoe                  | 1.74 | 0.0 | NM_009696    | Apoe          | 11816  |

|         |                       |      |     |              |               |        |
|---------|-----------------------|------|-----|--------------|---------------|--------|
| P206150 | Apoh                  | 1.65 | 0.0 | NM_013475    | Apoh          | 11818  |
| P202900 | Apon                  | 3.25 | 0.0 | NM_133996    | Apon          | 28194  |
| P100027 | App                   | 1.80 | 0.0 | NM_007471    | App           | 11820  |
| P100029 | Aqp8                  | 1.77 | 0.0 | NM_007474    | Aqp8          | 11833  |
| P202535 | Arhgap12              | 3.31 | 0.0 | NM_029277    | Arhgap12      | 75415  |
| P105251 | Arhgap23              | 1.42 | 0.0 | NM_021493    | Arhgap23      | 58996  |
| P200324 | Arrdc4                | 1.45 | 0.0 | NM_025549    | Arrdc4        | 66412  |
| P205194 | Atf4                  | 1.55 | 0.1 | NM_009716    | Atf4          | 11911  |
| P106319 | Atg12l                | 1.71 | 0.1 | NM_026217    | Atg12l        | 67526  |
| P105751 | Atp5j                 | 1.72 | 0.0 | NM_016755    | Atp5j         | 11957  |
| P209441 | AW011752              | 1.69 | 0.2 | NM_134034    | AW011752      | 104570 |
| P222322 | PROMOTER:NM_021345    | 1.56 | 0.0 | NM_021345    | AW742319      | 57874  |
| P223130 | PROMOTER:NM_177687    | 1.77 | 0.0 | NM_177687    | B230205M03    | 232430 |
| P201366 | B230380D07Rik         | 1.64 | 0.0 | NM_172772    | B230380D07Rik | 235461 |
| P102161 | Baat                  | 1.46 | 0.1 | NM_007519    | Baat          | 12012  |
| P104861 | Banf1                 | 1.48 | 0.0 | NM_011793    | Banf1         | 23825  |
| P202878 | BC022623              | 1.44 | 0.0 | NM_177632    | BC022623      | 224093 |
| P225092 | PROMOTER:NM_001001737 | 1.81 | 0.0 | NM_001001737 | BC055757      | 414758 |
| P201275 | Bcas3                 | 1.98 | 0.0 | NM_138681    | Bcas3         | 192197 |
| P106599 | Bmi1                  | 1.47 | 0.0 | NM_007552    | Bmi1          | 12151  |
| P102708 | Bnip3                 | 1.40 | 0.9 | NM_009760    | Bnip3         | 12176  |
| P213666 | ENHANCER:NM_009760    | 1.76 | 0.0 | NM_009760    | Bnip3         | 12176  |
| P203032 | Brca1                 | 1.45 | 0.2 | NM_009764    | Brca1         | 12189  |
| P209863 | Btbd3                 | 1.56 | 0.4 | NM_145534    | Btbd3         | 228662 |
| P103646 | C1r                   | 1.48 | 0.0 | NM_023143    | C1r           | 50909  |
| P220348 | PROMOTER:NM_181344    | 2.57 | 0.0 | NM_181344    | C1rl          | 232371 |
| P225606 | PROMOTER:NM_029939    | 1.59 | 0.0 | NM_029939    | C330001K17Rik | 77609  |
| P102178 | C4bp                  | 2.76 | 0.0 | NM_007576    | C4bp          | 12269  |
| P204179 | C4bp                  | 2.17 | 0.0 | NM_007576    | C4bp          | 12269  |
| P103306 | C6                    | 1.89 | 0.0 | NM_016704    | C6            | 12274  |
| P206427 | C6                    | 1.40 | 0.5 | NM_016704    | C6            | 12274  |
| P202142 | C730027P07Rik         | 1.70 | 0.2 | NM_177743    | C730027P07Rik | 245050 |
| P202149 | C8b                   | 1.61 | 0.0 | NM_133882    | C8b           | 110382 |
| P220827 | ENHANCER:NM_023341    | 1.64 | 0.0 | NM_023341    | Cabc1         | 67426  |
| P216957 | ENHANCER:NM_145575    | 1.59 | 0.0 | NM_145575    | Cald1         | 109624 |
| P100697 | Cat                   | 1.48 | 0.3 | NM_009804    | Cat           | 12359  |
| P209445 | Cbll1                 | 2.22 | 0.1 | NM_134048    | Cbll1         | 104836 |
| P216104 | ENHANCER:NM_028803    | 1.53 | 0.0 | NM_007720    | Ccr8          | 12776  |
| P216614 | ENHANCER:NM_133983    | 1.54 | 0.0 | NM_133983    | Cd276         | 102657 |
| P209917 | Cd300lf               | 1.51 | 0.0 | NM_145634    | Cd300lf       | 246746 |
| P100850 | Cd47                  | 1.76 | 0.0 | NM_010581    | Cd47          | 16423  |
| P100097 | Cd9                   | 1.41 | 0.0 | NM_007657    | Cd9           | 12527  |
| P206883 | Cdc42ep4              | 1.50 | 0.0 | NM_020006    | Cdc42ep4      | 56699  |
| P201832 | Cdca1                 | 1.43 | 0.0 | NM_023284    | Cdca1         | 66977  |
| P106620 | Cdh2                  | 1.42 | 0.1 | NM_007664    | Cdh2          | 12558  |
| P100101 | Cdk5                  | 1.78 | 0.0 | NM_007668    | Cdk5          | 12568  |
| P100719 | Cebpz                 | 1.73 | 0.0 | NM_009882    | Cebpz         | 12607  |
| P225524 | PROMOTER:NM_001024806 | 1.58 | 0.3 | NM_00102480  | Cebpz         | 12607  |

|         |                    |      |     | 6         |          |        |
|---------|--------------------|------|-----|-----------|----------|--------|
| P208972 | Cecr6              | 1.40 | 0.0 | NM_033567 | Cecr6    | 94047  |
| P204244 | Cfi                | 1.41 | 0.6 | NM_007686 | Cfi      | 12630  |
| P100110 | Chd1               | 1.97 | 0.0 | NM_007690 | Chd1     | 12648  |
| P100111 | Chga               | 1.64 | 0.0 | NM_007693 | Chga     | 12652  |
| P102104 | Chmp5              | 1.57 | 0.9 | NM_029814 | Chmp5    | 76959  |
| P100113 | Chuk               | 1.82 | 0.1 | NM_007700 | Chuk     | 12675  |
| P100723 | Cish               | 1.67 | 0.0 | NM_009895 | Cish     | 12700  |
| P102745 | Cish               | 1.72 | 0.0 | NM_009895 | Cish     | 12700  |
| P200974 | Clcn7              | 1.87 | 0.0 | NM_011930 | Clcn7    | 26373  |
| P216366 | ENHANCER:NM_053109 | 2.04 | 0.0 | NM_053109 | Clec2d   | 93694  |
| P215654 | ENHANCER:NM_026230 | 1.45 | 0.3 | NM_011999 | Clec4a2  | 26888  |
| P101143 | Cln8               | 2.00 | 0.0 | NM_012000 | Cln8     | 26889  |
| P104899 | Cln8               | 2.58 | 0.2 | NM_012000 | Cln8     | 26889  |
| P209025 | Cml2               | 1.43 | 0.7 | NM_053096 | Cml2     | 93673  |
| P201468 | Cnr2               | 2.35 | 0.0 | NM_009924 | Cnr2     | 12802  |
| P106630 | Coch               | 1.54 | 0.2 | NM_007728 | Coch     | 12810  |
| P107126 | Col10a1            | 1.44 | 1.1 | NM_009925 | Col10a1  | 12813  |
| P106631 | Col11a1            | 1.45 | 0.1 | NM_007729 | Col11a1  | 12814  |
| P106409 | Col2a1             | 1.53 | 0.0 | NM_031163 | Col2a1   | 12824  |
| P216441 | ENHANCER:NM_130449 | 1.49 | 0.0 | NM_130449 | Colec12  | 140792 |
| P206559 | Copg               | 1.46 | 0.0 | NM_017477 | Copg     | 54161  |
| P100125 | Crkl               | 1.53 | 0.0 | NM_007764 | Crkl     | 12929  |
| P201742 | Cryl1              | 1.43 | 0.1 | NM_030004 | Cryl1    | 68631  |
| P102057 | Cs                 | 2.54 | 0.0 | NM_026444 | Cs       | 12974  |
| P217001 | ENHANCER:NM_145953 | 1.90 | 0.0 | NM_145953 | Cth      | 107869 |
| P101765 | Ctnnbip1           | 1.40 | 0.4 | NM_023465 | Ctnnbip1 | 67087  |
| P204486 | Cxcl1              | 1.67 | 0.0 | NM_008176 | Cxcl1    | 14825  |
| P205286 | Cxcr4              | 1.48 | 0.1 | NM_009911 | Cxcr4    | 12767  |
| P221319 | ENHANCER:NM_025797 | 1.41 | 1.1 | NM_025797 | Cyb5     | 109672 |
| P102225 | Cyp17a1            | 1.61 | 0.1 | NM_007809 | Cyp17a1  | 13074  |
| P102771 | Cyp2a4             | 1.42 | 0.5 | NM_009997 | Cyp2a4   | 13086  |
| P107146 | Cyp2a4             | 1.54 | 0.0 | NM_009997 | Cyp2a4   | 13086  |
| P106661 | Cyp2a5             | 1.64 | 0.0 | NM_007812 | Cyp2a5   | 13087  |
| P107140 | Cyp2c37            | 1.46 | 0.5 | NM_010001 | Cyp2c37  | 13096  |
| P102775 | Cyp2c39            | 2.22 | 0.0 | NM_010003 | Cyp2c39  | 13098  |
| P107152 | Cyp2c40            | 1.60 | 0.0 | NM_010004 | Cyp2c40  | 13099  |
| P100742 | Cyp2d10            | 2.08 | 0.0 | NM_010005 | Cyp2d10  | 13101  |
| P209291 | Cyp2d13            | 1.90 | 0.0 | NM_133695 | Cyp2d13  | 68444  |
| P103945 | Cyp2d26            | 2.30 | 0.0 | NM_029562 | Cyp2d26  | 76279  |
| P106397 | Cyp2d26            | 1.56 | 0.0 | NM_029562 | Cyp2d26  | 76279  |
| P102777 | Cyp2d9             | 1.75 | 0.0 | NM_010006 | Cyp2d9   | 13105  |
| P105721 | Cyp2d9             | 1.91 | 0.1 | NM_010006 | Cyp2d9   | 13105  |
| P103557 | Cyp2e1             | 1.41 | 0.2 | NM_021282 | Cyp2e1   | 13106  |
| P102778 | Cyp2j5             | 1.74 | 0.0 | NM_010007 | Cyp2j5   | 13109  |
| P225371 | PROMOTER:NM_019792 | 1.74 | 0.0 | NM_019792 | Cyp3a25  | 56388  |
| P225540 | PROMOTER:NM_019792 | 1.59 | 0.0 | NM_019792 | Cyp3a25  | 56388  |
| P224233 | ENHANCER:NM_022434 | 2.26 | 0.0 | NM_022434 | Cyp4f14  | 64385  |
| P102238 | Cyp7b1             | 1.41 | 0.6 | NM_007825 | Cyp7b1   | 13123  |

|         |                      |      |     |           |               |        |
|---------|----------------------|------|-----|-----------|---------------|--------|
| P106669 | Cyp7b1               | 1.47 | 0.1 | NM_007825 | Cyp7b1        | 13123  |
| P221622 | PROMOTER:NM_177764   | 1.60 | 0.0 | NM_177764 | D430014M15    | 269902 |
| P201340 | D630039A03Rik        | 2.50 | 0.3 | NM_178727 | D630039A03Rik | 242484 |
| P212582 | miRNA:mmu-mir-21_U_1 | 1.77 | 0.9 | NM_010015 | Dad1          | 13135  |
| P220228 | PROMOTER:NM_010196   | 1.64 | 0.0 | NM_007916 | Ddx19a        | 13680  |
| P100150 | Dhcr7                | 1.47 | 3.6 | NM_007856 | Dhcr7         | 13360  |
| P106371 | Dhrs1                | 1.44 | 0.1 | NM_026819 | Dhrs1         | 52585  |
| P207537 | Dhrs7                | 1.54 | 0.0 | NM_025522 | Dhrs7         | 66375  |
| P215385 | ENHANCER:NM_025522   | 1.60 | 0.0 | NM_025522 | Dhrs7         | 66375  |
| P200614 | Dhx38                | 1.57 | 0.0 | NM_178380 | Dhx38         | 64340  |
| P225374 | PROMOTER:NM_144831   | 1.54 | 0.0 | NM_144831 | Dhx8          | 217207 |
| P104862 | Dmtf1                | 1.62 | 0.0 | NM_011806 | Dmtf1         | 23857  |
| P103876 | Dnajb11              | 1.43 | 0.5 | NM_026400 | Dnajb11       | 67838  |
| P206851 | Dnase2b              | 2.03 | 0.0 | NM_019957 | Dnase2b       | 56629  |
| P100750 | Dpm1                 | 1.64 | 0.2 | NM_010072 | Dpm1          | 13480  |
| P217627 | ENHANCER:NM_177688   | 1.49 | 0.0 | NM_177688 | E130307C13    | 232440 |
| P209989 | E430026E19Rik        | 1.56 | 0.0 | NM_146008 | E430026E19Rik | 216198 |
| P206667 | Ebag9                | 1.48 | 0.3 | NM_019480 | Ebag9         | 55960  |
| P204342 | Ect2                 | 1.43 | 0.3 | NM_007900 | Ect2          | 13605  |
| P101400 | Eef1b2               | 2.15 | 0.0 | NM_018796 | Eef1b2        | 55949  |
| P206594 | Eef1b2               | 2.65 | 0.0 | NM_018796 | Eef1b2        | 55949  |
| P204066 | Efcfbp1              | 1.43 | 0.4 | NM_178617 | Efcfbp1       | 69352  |
| P107164 | Efna1                | 2.06 | 0.0 | NM_010107 | Efna1         | 13636  |
| P205363 | Eif1a                | 4.29 | 0.0 | NM_010120 | Eif1a         | 13664  |
| P206167 | Eif4a2               | 1.46 | 0.0 | NM_013506 | Eif4a2        | 13682  |
| P100178 | Es1                  | 1.90 | 0.0 | NM_007954 | Es1           | 13884  |
| P213010 | ENHANCER:NM_007954   | 1.91 | 0.0 | NM_007954 | Es1           | 13884  |
| P219651 | ENHANCER:NM_007962   | 1.52 | 0.0 | NM_007962 | Eva1          | 14012  |
| P209945 | Evc2                 | 1.48 | 0.6 | NM_145920 | Evc2          | 68525  |
| P208873 | F13b                 | 1.78 | 0.0 | NM_031164 | F13b          | 14060  |
| P102801 | F2rl2                | 1.41 | 0.5 | NM_010170 | F2rl2         | 14064  |
| P102803 | F7                   | 2.37 | 0.0 | NM_010172 | F7            | 14068  |
| P213790 | ENHANCER:NM_010173   | 1.93 | 0.0 | NM_010173 | Faah          | 14073  |
| P213792 | ENHANCER:NM_010176   | 1.98 | 0.0 | NM_010176 | Fah           | 14085  |
| P101429 | Fbp1                 | 1.70 | 0.0 | NM_019395 | Fbp1          | 14121  |
| P200538 | Fbxo4                | 1.68 | 0.2 | NM_134099 | Fbxo4         | 106052 |
| P205389 | Fdft1                | 1.50 | 0.1 | NM_010191 | Fdft1         | 14137  |
| P213796 | ENHANCER:NM_010191   | 1.76 | 0.0 | NM_010191 | Fdft1         | 14137  |
| P201290 | Fem1a                | 1.72 | 0.1 | NM_010192 | Fem1a         | 14154  |
| P222499 | PROMOTER:NM_181849   | 1.74 | 0.0 | NM_181849 | Fgb           | 110135 |
| P200297 | Fgl2                 | 1.59 | 0.0 | NM_008013 | Fgl2          | 14190  |
| P101691 | Figl1                | 1.46 | 0.0 | NM_021891 | Figl1         | 60530  |
| P214719 | ENHANCER:NM_018881   | 1.93 | 0.0 | NM_018881 | Fmo2          | 55990  |
| P100196 | Fmo3                 | 3.40 | 0.0 | NM_008030 | Fmo3          | 14262  |
| P213033 | ENHANCER:NM_008030   | 2.30 | 0.0 | NM_008030 | Fmo3          | 14262  |
| P102860 | Foxa2                | 3.38 | 0.0 | NM_010446 | Foxa2         | 15376  |
| P103989 | Foxp2                | 1.47 | 0.5 | NM_053242 | Foxp2         | 114142 |
| P106437 | Foxp2                | 1.66 | 0.0 | NM_053242 | Foxp2         | 114142 |
| P102821 | Ftl1                 | 1.47 | 0.0 | NM_010240 | Ftl1          | 14325  |

|         |                    |      |     |           |           |        |
|---------|--------------------|------|-----|-----------|-----------|--------|
| P102822 | Fts                | 1.42 | 0.1 | NM_010241 | Fts       | 14339  |
| P101278 | G1p2               | 1.45 | 0.4 | NM_015783 | G1p2      | 53606  |
| P101612 | Gabarapl1          | 1.71 | 0.0 | NM_020590 | Gabarapl1 | 57436  |
| P206936 | Gabarapl1          | 2.56 | 0.0 | NM_020590 | Gabarapl1 | 57436  |
| P106722 | Gabpa              | 1.60 | 0.0 | NM_008065 | Gabpa     | 14390  |
| P100204 | Ganab              | 1.54 | 0.0 | NM_008060 | Ganab     | 14376  |
| P213050 | ENHANCER:NM_008086 | 1.49 | 0.0 | NM_008086 | Gas1      | 14451  |
| P213821 | ENHANCER:NM_010257 | 2.13 | 0.0 | NM_010257 | Gast      | 14459  |
| P106724 | Gata3              | 1.45 | 0.1 | NM_008091 | Gata3     | 14462  |
| P101248 | Gcat               | 1.74 | 0.1 | NM_013847 | Gcat      | 26912  |
| P103263 | Gcat               | 1.67 | 0.0 | NM_013847 | Gcat      | 26912  |
| P218825 | ENHANCER:NM_025638 | 1.58 | 0.4 | NM_025638 | Gdpd1     | 66569  |
| P209127 | Ghitm              | 1.44 | 0.3 | NM_078478 | Ghitm     | 66092  |
| P208896 | Gimap3             | 1.41 | 0.0 | NM_031247 | Gimap3    | 83408  |
| P104012 | Glcci1             | 1.44 | 0.7 | NM_133236 | Glcci1    | 170772 |
| P217167 | ENHANCER:NM_153547 | 2.28 | 0.0 | NM_153547 | Gnl3      | 30877  |
| P200584 | Gnpda2             | 1.47 | 0.1 | NM_027681 | Gnpda2    | 67980  |
| P204470 | Gpam               | 3.13 | 0.0 | NM_008149 | Gpam      | 14732  |
| P207157 | Gpr35              | 1.44 | 0.1 | NM_022320 | Gpr35     | 64095  |
| P203572 | Gprc5c             | 1.41 | 2.4 | NM_147217 | Gprc5c    | 70355  |
| P223094 | PROMOTER:NM_182805 | 1.41 | 0.9 | NM_182805 | Gpt1      | 76282  |
| P106737 | Gstm2              | 1.45 | 1.1 | NM_008183 | Gstm2     | 14863  |
| P105680 | Gyk                | 1.45 | 0.0 | NM_008194 | Gyk       | 14933  |
| P106743 | Gys3               | 1.42 | 0.0 | NM_008195 | Gys3      | 14936  |
| P203888 | H13                | 1.65 | 0.0 | NM_010376 | H13       | 14950  |
| P210031 | Habp2              | 2.54 | 0.0 | NM_146101 | Habp2     | 226243 |
| P202201 | Hadha              | 1.57 | 0.0 | NM_178878 | Hadha     | 97212  |
| P215268 | ENHANCER:NM_024284 | 4.19 | 0.0 | NM_024284 | Hagh      | 14651  |
| P102846 | Hao1               | 1.47 | 0.0 | NM_010403 | Hao1      | 15112  |
| P213863 | ENHANCER:NM_010403 | 1.60 | 0.0 | NM_010403 | Hao1      | 15112  |
| P200191 | Hbs1l              | 1.91 | 0.0 | NM_019702 | Hbs1l     | 56422  |
| P219874 | ENHANCER:NM_026101 | 1.45 | 0.0 | NM_026101 | Herc4     | 67345  |
| P103206 | Hgd                | 2.36 | 0.0 | NM_013547 | Hgd       | 15233  |
| P206184 | Hgd                | 1.75 | 0.0 | NM_013547 | Hgd       | 15233  |
| P103523 | Hirip5             | 1.41 | 0.2 | NM_020045 | Hirip5    | 56748  |
| P219424 | PROMOTER:NM_178187 | 1.44 | 0.5 | NM_178187 | Hist1h2ae | 319166 |
| P221855 | PROMOTER:NM_178186 | 1.60 | 0.0 | NM_178186 | Hist1h2ag | 319167 |
| P219095 | PROMOTER:NM_178182 | 1.42 | 0.3 | NM_178182 | Hist1h2ai | 319191 |
| P102221 | Hivep1             | 1.71 | 0.0 | NM_007772 | Hivep1    | 110521 |
| P100269 | Hpgd               | 1.98 | 0.0 | NM_008278 | Hpgd      | 15446  |
| P206642 | Hps1               | 1.47 | 1.1 | NM_019424 | Hps1      | 192236 |
| P206531 | Hpxn               | 2.24 | 0.0 | NM_017371 | Hpxn      | 15458  |
| P206190 | Hspa1l             | 1.56 | 0.2 | NM_013558 | Hspa1l    | 15482  |
| P213135 | ENHANCER:NM_008321 | 2.39 | 0.0 | NM_008321 | Id3       | 15903  |
| P104692 | Idh1               | 2.36 | 0.0 | NM_010497 | Idh1      | 15926  |
| P106790 | Igfbp1             | 2.82 | 0.0 | NM_008341 | Igfbp1    | 16006  |
| P100840 | Igfbp4             | 1.54 | 0.6 | NM_010517 | Igfbp4    | 16010  |
| P205522 | Igfbp4             | 1.57 | 0.0 | NM_010517 | Igfbp4    | 16010  |
| P100842 | Il11ra1            | 1.41 | 1.9 | NM_010549 | Il11ra1   | 16157  |



|         |                       |      |     |              |           |        |
|---------|-----------------------|------|-----|--------------|-----------|--------|
| P201292 | Il4ra                 | 2.86 | 0.2 | NM_010557    | Il4ra     | 16190  |
| P216283 | ENHANCER:NM_031168    | 1.70 | 0.0 | NM_031168    | Il6       | 16193  |
| P100845 | Il6st                 | 1.57 | 0.0 | NM_010560    | Il6st     | 16195  |
| P224499 | ENHANCER:NM_008382    | 1.84 | 0.0 | NM_008382    | Inhbe     | 16326  |
| P217161 | ENHANCER:NM_153526    | 1.42 | 1.4 | NM_153526    | Insig1    | 231070 |
| P106455 | Insig2                | 1.57 | 0.0 | NM_133748    | Insig2    | 72999  |
| P218901 | ENHANCER:NM_008406    | 2.65 | 0.0 | NM_008406    | Itih1     | 16424  |
| P100298 | Itm2b                 | 1.64 | 0.2 | NM_008410    | Itm2b     | 16432  |
| P102382 | Itm2b                 | 1.43 | 0.1 | NM_008410    | Itm2b     | 16432  |
| P202225 | Itpkc                 | 1.49 | 0.0 | NM_181593    | Itpkc     | 233011 |
| P102899 | Itpr1                 | 1.63 | 0.0 | NM_010585    | Itpr1     | 16438  |
| P225225 | PROMOTER:NM_001017426 | 2.08 | 0.0 | NM_001017426 | Jmjd3     | 216850 |
| P100301 | Junb                  | 1.66 | 0.0 | NM_008416    | Junb      | 16477  |
| P102386 | Junb                  | 2.09 | 0.0 | NM_008416    | Junb      | 16477  |
| P100096 | Kai1                  | 3.71 | 0.0 | NM_007656    | Kai1      | 12521  |
| P225020 | PROMOTER:NM_028805    | 1.92 | 0.0 | NM_028805    | Katnb1    | 74187  |
| P217004 | ENHANCER:NM_145958    | 1.81 | 0.3 | NM_145958    | Kbtbd2    | 210973 |
| P205552 | Kif9                  | 1.47 | 0.3 | NM_010628    | Kif9      | 16578  |
| P103649 | Klf15                 | 2.56 | 0.0 | NM_023184    | Klf15     | 66277  |
| P213169 | ENHANCER:NM_008453    | 2.15 | 0.0 | NM_008453    | Klf3      | 16599  |
| P221876 | PROMOTER:NM_177771    | 4.22 | 0.0 | NM_177771    | Klhl18    | 270201 |
| P204605 | Klkb1                 | 1.69 | 0.3 | NM_008455    | Klkb1     | 16621  |
| P101724 | Kng1                  | 2.92 | 0.0 | NM_023125    | Kng1      | 16644  |
| P207220 | Kng1                  | 1.75 | 0.0 | NM_023125    | Kng1      | 16644  |
| P225091 | PROMOTER:NM_201375    | 2.50 | 0.0 | NM_201375    | Kng2      | 385643 |
| P202483 | Ldlr                  | 1.46 | 0.0 | NM_010700    | Ldlr      | 16835  |
| P213181 | ENHANCER:NM_008498    | 1.56 | 0.0 | NM_008498    | Lhx1      | 16869  |
| P219411 | ENHANCER:NM_013584    | 3.29 | 0.0 | NM_013584    | Lifr      | 16880  |
| P102363 | Lipc                  | 1.87 | 0.0 | NM_008280    | Lipc      | 15450  |
| P225286 | PROMOTER:NM_001013775 | 1.96 | 0.0 | NM_001013775 | LOC381806 | 381806 |
| P203557 | Lrg1                  | 1.89 | 0.0 | NM_029796    | Lrg1      | 76905  |
| P202639 | Lrp1                  | 2.72 | 0.0 | NM_008512    | Lrp1      | 16971  |
| P216025 | ENHANCER:NM_028233    | 1.61 | 0.0 | NM_028233    | Lrpprc    | 72416  |
| P203526 | Lrrc33                | 1.84 | 0.0 | NM_146069    | Lrrc33    | 224109 |
| P202309 | Lrrc41                | 1.47 | 0.2 | NM_153521    | Lrrc41    | 230654 |
| P202496 | Lrrk1                 | 1.90 | 0.1 | NM_146191    | Lrrk1     | 233328 |
| P200752 | Lyn                   | 2.44 | 0.0 | NM_010747    | Lyn       | 17096  |
| P100873 | Mad                   | 1.92 | 0.0 | NM_010751    | Mad       | 17119  |
| P100875 | Mafg                  | 1.43 | 0.0 | NM_010756    | Mafg      | 17134  |
| P102933 | Mafg                  | 1.44 | 0.2 | NM_010756    | Mafg      | 17134  |
| P213965 | ENHANCER:NM_010757    | 1.50 | 0.3 | NM_010757    | Mafk      | 17135  |
| P217768 | ENHANCER:NM_178920    | 2.92 | 0.0 | NM_178920    | Mal2      | 105853 |
| P104887 | Mapkbp1               | 1.42 | 0.0 | NM_011941    | Mapkbp1   | 26390  |
| P216485 | ENHANCER:NM_133653    | 2.25 | 0.0 | NM_133653    | Mat1a     | 11720  |
| P219210 | ENHANCER:NM_010776    | 1.70 | 0.0 | NM_010776    | Mbl2      | 17195  |
| P201411 | Mcm4                  | 1.75 | 0.0 | NM_008565    | Mcm4      | 17217  |
| P221804 | ENHANCER:NM_008587    | 1.48 | 0.0 | NM_008587    | Mertk     | 17289  |

|         |                       |      |     |                   |             |        |
|---------|-----------------------|------|-----|-------------------|-------------|--------|
| P225825 | PROMOTER:NM_001012323 | 3.21 | 0.0 | NM_001012323<br>3 | MGC107671   | 381530 |
| P202727 | Mgea6                 | 1.73 | 0.0 | NM_146034         | Mgea6       | 217615 |
| P214770 | ENHANCER:NM_019580    | 1.57 | 0.0 | NM_019580         | MGI:1891827 | 56209  |
| P219417 | ENHANCER:NM_030237    | 1.85 | 0.0 | NM_030237         | MGI:1930801 | 79401  |
| P223166 | PROMOTER:NM_176846    | 2.74 | 0.0 | NM_176846         | MGI:2443248 | 320051 |
| P104092 | MGI:2672795           | 1.42 | 0.0 | NM_153069         | MGI:2672795 | 259301 |
| P101668 | Mkks                  | 1.44 | 0.3 | NM_021527         | Mkks        | 59030  |
| P216376 | ENHANCER:NM_053163    | 1.46 | 0.0 | NM_053163         | Mrpl36      | 94066  |
| P202215 | Mrps2                 | 1.41 | 1.1 | NM_080452         | Mrps2       | 118451 |
| P213230 | ENHANCER:NM_008630    | 1.43 | 0.0 | NM_008630         | Mt2         | 17750  |
| P200579 | Mtac2d1               | 1.41 | 2.4 | NM_028924         | Mtac2d1     | 74413  |
| P103329 | Mtx2                  | 1.46 | 0.9 | NM_016804         | Mtx2        | 53375  |
| P102442 | Mug1                  | 1.44 | 0.1 | NM_008645         | Mug1        | 17836  |
| P103965 | Mup1                  | 2.34 | 0.0 | NM_031188         | Mup1        | 17840  |
| P106415 | Mup1                  | 2.74 | 0.0 | NM_031188         | Mup1        | 17840  |
| P225576 | PROMOTER:NM_008647    | 3.22 | 0.0 | NM_008647         | Mup2        | 17841  |
| P225724 | PROMOTER:NM_008647    | 3.26 | 0.0 | NM_008647         | Mup2        | 17841  |
| P225381 | PROMOTER:NM_010845    | 3.94 | 0.0 | NM_010845         | Mup3        | 17842  |
| P102443 | Mup4                  | 4.19 | 0.0 | NM_008648         | Mup4        | 17843  |
| P106853 | Mup4                  | 1.51 | 0.0 | NM_008648         | Mup4        | 17843  |
| P218527 | PROMOTER:NM_008649    | 3.65 | 0.0 | NM_008649         | Mup5        | 17844  |
| P209735 | Myh2                  | 1.44 | 0.2 | NM_144961         | Myh2        | 17882  |
| P101252 | Ndrp2                 | 1.43 | 0.2 | NM_013864         | Ndrp2       | 29811  |
| P205664 | Ndufa2                | 1.45 | 0.2 | NM_010885         | Ndufa2      | 17991  |
| P106370 | Ndufa8                | 1.45 | 0.0 | NM_026703         | Ndufa8      | 68375  |
| P106489 | Ndufs8                | 3.37 | 0.0 | NM_144870         | Ndufs8      | 225887 |
| P209175 | Nek8                  | 1.79 | 0.0 | NM_080849         | Nek8        | 140859 |
| P102450 | Nkx2-5                | 1.56 | 0.9 | NM_008700         | Nkx2-5      | 18091  |
| P106029 | Nqo2                  | 2.04 | 0.0 | NM_020282         | Nqo2        | 18105  |
| P206033 | Nr0b2                 | 2.40 | 0.0 | NM_011850         | Nr0b2       | 23957  |
| P200647 | Nr1i2                 | 2.88 | 0.0 | NM_010936         | Nr1i2       | 18171  |
| P209921 | Nup43                 | 1.46 | 0.0 | NM_145706         | Nup43       | 69912  |
| P223526 | ENHANCER:NM_010959    | 1.71 | 0.0 | NM_010959         | Oit3        | 18302  |
| P219712 | PROMOTER:NM_146465    | 1.44 | 3.6 | NM_146465         | Olf108      | 258457 |
| P220731 | PROMOTER:NM_146270    | 1.99 | 0.0 | NM_146270         | Olf370      | 258267 |
| P206127 | Omd                   | 1.96 | 0.0 | NM_012050         | Omd         | 27047  |
| P224652 | PROMOTER:NM_001003949 | 2.28 | 0.0 | NM_001003949<br>9 | ORF61       | 216157 |
| P100939 | Pa2g4                 | 1.55 | 0.0 | NM_011119         | Pa2g4       | 18813  |
| P206669 | Panx1                 | 1.41 | 0.2 | NM_019482         | Panx1       | 55991  |
| P200625 | Pcgf5                 | 1.41 | 0.0 | NM_029508         | Pcgf5       | 76073  |
| P102981 | Pck1                  | 1.44 | 0.0 | NM_011044         | Pck1        | 18534  |
| P104133 | Pck1                  | 1.72 | 0.3 | NM_011044         | Pck1        | 18534  |
| P205702 | Pck1                  | 1.69 | 0.0 | NM_011044         | Pck1        | 18534  |
| P102473 | Pde6d                 | 1.43 | 0.9 | NM_008801         | Pde6d       | 18582  |
| P101226 | Pdk4                  | 1.41 | 0.9 | NM_013743         | Pdk4        | 27273  |
| P206280 | Pdk4                  | 2.09 | 0.0 | NM_013743         | Pdk4        | 27273  |
| P204782 | Pemt                  | 1.73 | 0.2 | NM_008819         | Pemt        | 18618  |

|         |                    |      |     |           |         |        |
|---------|--------------------|------|-----|-----------|---------|--------|
| P213291 | ENHANCER:NM_008819 | 2.05 | 0.0 | NM_008819 | Pemt    | 18618  |
| P202813 | Per1               | 2.66 | 0.0 | NM_011065 | Per1    | 18626  |
| P223553 | ENHANCER:NM_011066 | 2.29 | 0.0 | NM_011066 | Per2    | 18627  |
| P200826 | Pes1               | 1.50 | 0.1 | NM_022889 | Pes1    | 64934  |
| P100928 | Pfdn2              | 1.61 | 1.1 | NM_011070 | Pfdn2   | 18637  |
| P102988 | Pfdn2              | 1.55 | 0.7 | NM_011070 | Pfdn2   | 18637  |
| P103719 | Phf10              | 1.43 | 0.3 | NM_024250 | Phf10   | 72057  |
| P104065 | Pi4k2a             | 1.99 | 0.0 | NM_145501 | Pi4k2a  | 84095  |
| P103522 | Pigo               | 1.46 | 0.3 | NM_020035 | Pigo    | 56703  |
| P214045 | ENHANCER:NM_011082 | 2.23 | 0.0 | NM_011082 | Pigr    | 18703  |
| P106410 | Pik3ap1            | 1.46 | 0.1 | NM_031376 | Pik3ap1 | 83490  |
| P214650 | ENHANCER:NM_016915 | 1.97 | 0.0 | NM_016915 | Pla2g6  | 53357  |
| P204800 | Pld2               | 1.52 | 0.2 | NM_008876 | Pld2    | 18806  |
| P217810 | ENHANCER:NM_182930 | 1.88 | 0.0 | NM_182930 | Plekha6 | 240753 |
| P217201 | ENHANCER:NM_153804 | 4.75 | 0.0 | NM_153804 | Plekhg3 | 263406 |
| P102511 | Plg                | 1.49 | 0.2 | NM_008877 | Plg     | 18815  |
| P214343 | ENHANCER:NM_011961 | 2.37 | 0.0 | NM_011961 | Plod2   | 26432  |
| P214602 | ENHANCER:NM_016784 | 1.94 | 0.0 | NM_016784 | Plrg1   | 53317  |
| P215475 | ENHANCER:NM_025802 | 1.53 | 0.0 | NM_025802 | Pnpla2  | 66853  |
| P102568 | Polr2c             | 1.45 | 3.6 | NM_009090 | Polr2c  | 20021  |
| P217832 | ENHANCER:NM_183308 | 1.44 | 0.0 | NM_183308 | Pon2    | 330260 |
| P200119 | Pot1               | 1.95 | 0.0 | NM_133931 | Pot1    | 101185 |
| P214064 | ENHANCER:NM_011144 | 1.89 | 0.0 | NM_011144 | Ppara   | 19013  |
| P103009 | Pparg              | 1.70 | 0.0 | NM_011146 | Pparg   | 19016  |
| P221335 | PROMOTER:NM_011151 | 1.67 | 0.9 | NM_011151 | Ppm1b   | 19043  |
| P208977 | Prcc               | 1.91 | 0.0 | NM_033573 | Prcc    | 94315  |
| P100920 | Prdx1              | 1.45 | 0.0 | NM_011034 | Prdx1   | 18477  |
| P100021 | Prdx6              | 1.69 | 0.2 | NM_007453 | Prdx6   | 11758  |
| P106925 | Prkar2a            | 1.55 | 0.0 | NM_008924 | Prkar2a | 19087  |
| P103012 | Prkdc              | 1.54 | 0.2 | NM_011159 | Prkdc   | 19090  |
| P207541 | Prlpk              | 1.56 | 0.0 | NM_025532 | Prlpk   | 66392  |
| P214076 | ENHANCER:NM_011173 | 2.20 | 0.0 | NM_011173 | Pros1   | 19128  |
| P103016 | Psen2              | 1.47 | 0.0 | NM_011183 | Psen2   | 19165  |
| P205763 | Psen2              | 2.27 | 0.0 | NM_011183 | Psen2   | 19165  |
| P214439 | ENHANCER:NM_013640 | 2.55 | 0.0 | NM_013640 | Psmb10  | 19171  |
| P205766 | Psme1              | 1.60 | 0.0 | NM_011189 | Psme1   | 19186  |
| P225318 | PROMOTER:NM_026873 | 1.53 | 0.0 | NM_026873 | Ptcd2   | 68927  |
| P100183 | Ptk2               | 1.53 | 0.7 | NM_007982 | Ptk2    | 14083  |
| P215140 | ENHANCER:NM_023268 | 1.62 | 0.0 | NM_023268 | Qscn6   | 104009 |
| P202873 | Rab3b              | 1.49 | 0.0 | NM_023537 | Rab3b   | 69908  |
| P220416 | ENHANCER:NM_009023 | 1.70 | 0.0 | NM_009023 | Rapsn   | 19400  |
| P225664 | PROMOTER:NM_028478 | 2.48 | 0.0 | NM_028478 | Rassf6  | 73246  |
| P210463 | Rbbp5              | 4.08 | 0.0 | NM_172517 | Rbbp5   | 213464 |
| P219945 | PROMOTER:NM_080436 | 2.33 | 0.0 | NM_080436 | Rdh1    | 107605 |
| P104456 | Rdh16              | 1.58 | 0.9 | NM_009040 | Rdh16   | 19683  |
| P204889 | Rdh16              | 1.50 | 0.2 | NM_009040 | Rdh16   | 19683  |
| P206556 | Rdh7               | 2.22 | 0.0 | NM_017473 | Rdh7    | 54150  |
| P210193 | Rdh9               | 1.78 | 0.0 | NM_153133 | Rdh9    | 103142 |
| P100471 | Rdx                | 2.85 | 0.0 | NM_009041 | Rdx     | 19684  |

|         |                    |      |     |           |           |        |
|---------|--------------------|------|-----|-----------|-----------|--------|
| P207224 | Renbp              | 1.51 | 0.0 | NM_023132 | Renbp     | 19703  |
| P106117 | Retn               | 1.54 | 0.0 | NM_022984 | Retn      | 57264  |
| P212837 | ENHANCER:NM_007485 | 1.51 | 0.0 | NM_007485 | Rhod      | 11854  |
| P207606 | Ribc1              | 1.41 | 0.6 | NM_025660 | Ribc1     | 66611  |
| P214119 | ENHANCER:NM_011278 | 1.48 | 0.0 | NM_011278 | Rnf4      | 19822  |
| P103448 | Rpl21              | 1.48 | 0.0 | NM_019647 | Rpl21     | 19933  |
| P214781 | ENHANCER:NM_019647 | 2.07 | 0.0 | NM_019647 | Rpl21     | 19933  |
| P215168 | ENHANCER:NM_023544 | 2.25 | 0.0 | NM_023544 | Rsc1a1    | 69994  |
| P219373 | ENHANCER:NM_011315 | 2.84 | 0.0 | NM_011315 | Saa3      | 20210  |
| P205816 | Saa4               | 1.42 | 0.1 | NM_011316 | Saa4      | 20211  |
| P206490 | Sah                | 2.87 | 0.0 | NM_016870 | Sah       | 20216  |
| P215387 | ENHANCER:NM_025535 | 1.82 | 0.0 | NM_025535 | Sara2     | 66397  |
| P206439 | Scarb1             | 1.43 | 0.7 | NM_016741 | Scarb1    | 20778  |
| P224655 | PROMOTER:NM_029022 | 1.56 | 0.0 | NM_029022 | Scrn3     | 74616  |
| P217056 | ENHANCER:NM_146126 | 2.06 | 0.0 | NM_146126 | Sdh1      | 20322  |
| P100546 | Sephs2             | 2.16 | 0.0 | NM_009266 | Sephs2    | 20768  |
| P217937 | ENHANCER:NM_199314 | 1.56 | 2.1 | NM_199314 | Serpina11 | 380780 |
| P100542 | Serpina1a          | 1.53 | 0.0 | NM_009243 | Serpina1a | 20700  |
| P102591 | Serpina1a          | 2.17 | 0.0 | NM_009243 | Serpina1a | 20700  |
| P106976 | Serpina1a          | 1.48 | 0.0 | NM_009243 | Serpina1a | 20700  |
| P204994 | Serpina1b          | 3.83 | 0.0 | NM_009244 | Serpina1b | 20701  |
| P102592 | Serpina1d          | 1.87 | 0.0 | NM_009246 | Serpina1d | 20703  |
| P218322 | PROMOTER:NM_009247 | 2.08 | 0.0 | NM_009247 | Serpina1e | 20704  |
| P204997 | Serpina3m          | 1.50 | 0.4 | NM_009253 | Serpina3m | 20717  |
| P104193 | Serpina6           | 6.15 | 0.0 | NM_007618 | Serpina6  | 12401  |
| P204206 | Serpina6           | 2.42 | 0.0 | NM_007618 | Serpina6  | 12401  |
| P209171 | Serpinc1           | 1.51 | 0.1 | NM_080844 | Serpinc1  | 11905  |
| P100420 | Serpinf2           | 2.09 | 0.0 | NM_008878 | Serpinf2  | 18816  |
| P102512 | Serpinf2           | 2.87 | 0.0 | NM_008878 | Serpinf2  | 18816  |
| P213312 | ENHANCER:NM_008878 | 1.63 | 0.0 | NM_008878 | Serpinf2  | 18816  |
| P104910 | Sh3d19             | 1.57 | 0.4 | NM_012059 | Sh3d19    | 27059  |
| P101009 | Sin3a              | 1.41 | 0.2 | NM_011378 | Sin3a     | 20466  |
| P223114 | PROMOTER:NM_013768 | 1.41 | 1.7 | NM_013768 | Skb1      | 27374  |
| P207166 | Slc13a2            | 1.57 | 0.0 | NM_022411 | Slc13a2   | 20500  |
| P202146 | Slc17a2            | 2.30 | 0.0 | NM_144836 | Slc17a2   | 218103 |
| P202941 | Slc25a10           | 1.43 | 0.5 | NM_013770 | Slc25a10  | 27376  |
| P103052 | Slc25a14           | 1.44 | 0.1 | NM_011398 | Slc25a14  | 20523  |
| P210040 | Slc25a25           | 1.55 | 0.1 | NM_146118 | Slc25a25  | 227731 |
| P217442 | ENHANCER:NM_175090 | 1.74 | 0.0 | NM_175090 | Slc31a1   | 20529  |
| P100206 | Slc37a4            | 1.81 | 0.1 | NM_008063 | Slc37a4   | 14385  |
| P215998 | ENHANCER:NM_028092 | 1.42 | 1.1 | NM_028092 | Slc39a5   | 72002  |
| P209274 | Slc6a12            | 2.56 | 0.0 | NM_133661 | Slc6a12   | 14411  |
| P206859 | Son                | 1.42 | 0.0 | NM_019973 | Son       | 20658  |
| P214882 | ENHANCER:NM_019972 | 3.20 | 0.0 | NM_019972 | Sort1     | 20661  |
| P215010 | ENHANCER:NM_021507 | 4.33 | 0.0 | NM_021507 | Sqrdl     | 59010  |
| P217096 | ENHANCER:NM_146258 | 1.46 | 0.0 | NM_146258 | Stard13   | 243362 |
| P221090 | ENHANCER:NM_023377 | 1.96 | 0.0 | NM_023377 | Stard5    | 170460 |
| P105190 | Stat2              | 1.72 | 0.0 | NM_019963 | Stat2     | 20847  |
| P216318 | ENHANCER:NM_033074 | 1.71 | 0.0 | NM_033074 | Tars      | 110960 |

|         |                    |      |     |           |          |        |
|---------|--------------------|------|-----|-----------|----------|--------|
| P215451 | ENHANCER:NM_025706 | 2.77 | 0.0 | NM_025706 | Tbc1d15  | 66687  |
| P203393 | Tbc1d17            | 2.57 | 0.0 | NM_144924 | Tbc1d17  | 233204 |
| P202855 | Tbl1xr1            | 1.74 | 0.1 | NM_175304 | Tbl1xr1  | 81004  |
| P106414 | Tcfap4             | 1.47 | 0.5 | NM_031182 | Tcfap4   | 83383  |
| P225477 | PROMOTER:NM_009340 | 1.43 | 0.6 | NM_009340 | Tcp10a   | 21460  |
| P102621 | Terf2              | 1.47 | 0.6 | NM_009353 | Terf2    | 21750  |
| P102622 | Tex261             | 1.40 | 1.3 | NM_009357 | Tex261   | 21766  |
| P213515 | ENHANCER:NM_009379 | 1.44 | 0.6 | NM_009379 | Thpo     | 21832  |
| P213517 | ENHANCER:NM_009383 | 1.60 | 0.0 | NM_009383 | Tial1    | 21843  |
| P209508 | Timd2              | 1.48 | 0.0 | NM_134249 | Timd2    | 171284 |
| P103269 | Timm10             | 1.44 | 0.1 | NM_013896 | Timm10   | 30056  |
| P101039 | Tjp2               | 1.54 | 0.1 | NM_011597 | Tjp2     | 21873  |
| P100585 | Tk1                | 1.46 | 0.4 | NM_009387 | Tk1      | 21877  |
| P101043 | Tnfrsf1a           | 1.44 | 0.0 | NM_011609 | Tnfrsf1a | 21937  |
| P100595 | Tpst2              | 1.89 | 0.0 | NM_009419 | Tpst2    | 22022  |
| P104542 | Tpst2              | 1.87 | 0.0 | NM_009419 | Tpst2    | 22022  |
| P106350 | Trap1              | 1.56 | 0.0 | NM_026508 | Trap1    | 68015  |
| P207249 | Trim13             | 1.45 | 0.0 | NM_023233 | Trim13   | 66597  |
| P217405 | ENHANCER:NM_173378 | 1.91 | 0.0 | NM_173378 | Trp53bp2 | 209456 |
| P209510 | Trpm8              | 1.48 | 1.3 | NM_134252 | Trpm8    | 171382 |
| P213537 | ENHANCER:NM_009437 | 1.72 | 0.0 | NM_009437 | Tst      | 22117  |
| P216295 | ENHANCER:NM_031201 | 2.04 | 0.0 | NM_031201 | Tsta3    | 22122  |
| P216072 | ENHANCER:NM_028639 | 1.62 | 0.0 | NM_028639 | Ttc7     | 225049 |
| P104951 | Ttr                | 2.02 | 0.0 | NM_013697 | Ttr      | 22139  |
| P103478 | Tusc2              | 2.05 | 0.0 | NM_019742 | Tusc2    | 80385  |
| P223882 | PROMOTER:NM_175646 | 1.66 | 0.0 | NM_175646 | Txnl4b   | 234723 |
| P105188 | Ube2l6             | 1.41 | 0.0 | NM_019949 | Ube2l6   | 56791  |
| P101121 | Ubl3               | 1.65 | 0.0 | NM_011908 | Ubl3     | 24109  |
| P101064 | Ufd1l              | 1.84 | 0.0 | NM_011672 | Ufd1l    | 22230  |
| P205963 | Ufd1l              | 1.84 | 0.1 | NM_011672 | Ufd1l    | 22230  |
| P210288 | Ugt2b34            | 1.49 | 0.2 | NM_153598 | Ugt2b34  | 100727 |
| P202901 | Ugt2b35            | 1.42 | 0.2 | NM_172881 | Ugt2b35  | 243085 |
| P100615 | Uox                | 1.51 | 0.0 | NM_009474 | Uox      | 22262  |
| P205095 | Uox                | 1.43 | 0.0 | NM_009474 | Uox      | 22262  |
| P209730 | Uroc1              | 3.73 | 0.0 | NM_144940 | Uroc1    | 243537 |
| P104843 | Vars2              | 1.40 | 0.9 | NM_011690 | Vars2    | 22321  |
| P205970 | Vars2              | 1.43 | 0.6 | NM_011690 | Vars2    | 22321  |
| P100621 | Vdr                | 1.47 | 0.0 | NM_009504 | Vdr      | 22337  |
| P214994 | ENHANCER:NM_021455 | 1.93 | 0.0 | NM_021455 | Wbscr14  | 58805  |
| P203317 | Wdr23              | 1.85 | 0.0 | NM_133734 | Wdr23    | 28199  |
| P101616 | Wdr46              | 2.81 | 0.0 | NM_020603 | Wdr46    | 57315  |
| P206940 | Wdr46              | 2.50 | 0.1 | NM_020603 | Wdr46    | 57315  |
| P217896 | ENHANCER:NM_198606 | 1.67 | 0.0 | NM_198606 | Wdsof1   | 223499 |
| P102667 | Zbtb17             | 1.40 | 0.1 | NM_009541 | Zbtb17   | 22642  |
| P203904 | Zbtb5              | 1.58 | 0.1 | NM_173399 | Zbtb5    | 230119 |
| P103547 | Zc3h8              | 1.41 | 0.2 | NM_020594 | Zc3h8    | 57432  |
| P201551 | Zdhhc17            | 3.04 | 0.0 | NM_172554 | Zdhhc17  | 320150 |
| P103509 | Zfp111             | 1.45 | 0.3 | NM_019940 | Zfp111   | 56707  |
| P219825 | ENHANCER:NM_019747 | 1.55 | 0.0 | NM_019747 | Zfp113   | 56314  |

|         |                                 |      |     |           |        |        |
|---------|---------------------------------|------|-----|-----------|--------|--------|
| P217920 | ENHANCER:NM_199029              | 1.78 | 0.0 | NM_199029 | Zfp395 | 380912 |
| P218249 | PROMOTER:NM_016683              | 1.42 | 0.0 | NM_016683 | Zfp95  | 22757  |
| P202461 | Zfp96                           | 1.44 | 0.9 | NM_016684 | Zfp96  | 22758  |
| P218783 | ENHANCER:NM_026670              | 1.94 | 0.0 | NM_026670 | Zmym1  | 68310  |
| P210455 | Zswim4                          | 1.61 | 0.1 | NM_172503 | Zswim4 | 212168 |
| P100192 | NM_008015                       | 1.49 | 3.0 | NM_008015 |        |        |
| P100280 | NM_008322                       | 2.12 | 0.0 | NM_008322 |        |        |
| P101607 | NM_020573                       | 1.86 | 0.0 | NM_020573 |        |        |
| P105574 | NM_008252                       | 1.43 | 1.9 | NM_008252 |        |        |
| P204742 | NM_008735                       | 1.58 | 0.0 | NM_008735 |        |        |
| P210547 | NM_172674                       | 1.42 | 0.0 | NM_172674 |        |        |
| P210840 | CONSERVED:ADCYAP1_cnr_c         | 1.57 | 0.0 |           |        |        |
| P211136 | CONSERVED:CR846394              | 1.46 | 0.0 |           |        |        |
| P211139 | CONSERVED:CR846399              | 1.44 | 0.0 |           |        |        |
| P211140 | CONSERVED:CR846400              | 2.05 | 0.0 |           |        |        |
| P211253 | CONSERVED:CR846531              | 2.57 | 0.0 |           |        |        |
| P212585 | miRNA:mmu-mir-21_U_4            | 1.67 | 0.0 |           |        |        |
| P212702 | miRNA:mmu-mir-31_D_5            | 1.47 | 0.5 |           |        |        |
| P215520 | ENHANCER:NM_025888              | 1.47 | 0.0 |           |        |        |
| P218075 | CONSERVED:SCGN_cnr_d            | 1.59 | 0.0 |           |        |        |
| P218145 | CONSERVED:TTR_cnr_a             | 2.91 | 0.0 |           |        |        |
| P221473 | PROMOTER:NM_009245              | 7.66 | 0.0 | NM_009245 |        |        |
| P225841 | chr14_58250184:58251184_mouse   | 1.59 | 0.0 |           |        |        |
| P225855 | chr8_119864402:119865402_mouse  | 1.43 | 0.6 |           |        |        |
| P225863 | chr4_113467283:113468283_mouse  | 1.41 | 3.6 |           |        |        |
| P225944 | chr1_91328020:91329020_mouse    | 1.50 | 0.0 |           |        |        |
| P225965 | chr5_120331016:120332016_mouse  | 1.71 | 0.0 |           |        |        |
| P225992 | chr14_112743810:112744810_mouse | 1.53 | 0.0 |           |        |        |
| P226029 | chr4_123063315:123064315_mouse  | 1.46 | 1.1 |           |        |        |
| P226037 | chr5_23475653:23476653_mouse    | 2.01 | 0.0 |           |        |        |
| P226111 | chr4_52840062:52841062_mouse    | 1.99 | 0.0 |           |        |        |
| P226137 | chr8_72246317:72247317_mouse    | 1.50 | 0.3 |           |        |        |
| P226241 | chr8_106507302:106508302_mouse  | 1.45 | 0.6 |           |        |        |
| P226277 | chr18_13151580:13152580_mouse   | 2.69 | 0.0 |           |        |        |
| P226376 | chr1_93064523:93065523_mouse    | 1.55 | 0.3 |           |        |        |
| P226397 | chr3_30365995:30366995_mouse    | 1.43 | 0.0 |           |        |        |
| P226601 | chr1_82757348:82758348_mouse    | 1.53 | 0.0 |           |        |        |

|         |                                 |      |     |  |  |  |
|---------|---------------------------------|------|-----|--|--|--|
| P226634 | chr13_111874563:111875563_mouse | 1.43 | 0.0 |  |  |  |
| P226644 | chr17_85190676:85191676_mouse   | 2.96 | 0.0 |  |  |  |
| P226653 | chr4_58599909:58600909_mouse    | 1.57 | 0.0 |  |  |  |
| P226671 | chr1_40561676:40562676_mouse    | 1.78 | 0.4 |  |  |  |
| P226712 | chr18_43738911:43739911_mouse   | 1.47 | 0.0 |  |  |  |
| P226743 | chr15_41803278:41804278_mouse   | 1.51 | 0.0 |  |  |  |
| P226784 | chr2_27532637:27533637_mouse    | 2.03 | 0.0 |  |  |  |
| P226885 | chr6_121748411:121749411_mouse  | 2.65 | 0.0 |  |  |  |
| P226889 | chr9_70494179:70495179_mouse    | 2.01 | 0.0 |  |  |  |
| P226963 | chr7_98299720:98300720_mouse    | 1.42 | 1.7 |  |  |  |
| P227187 | chr4_99561791:99562791_mouse    | 2.19 | 0.0 |  |  |  |
| P227327 | chr16_21476449:21477449_mouse   | 1.49 | 0.0 |  |  |  |
| P227438 | chr2_134574804:134575804_mouse  | 1.92 | 0.0 |  |  |  |
| P227568 | chr1_105100414:105101414_mouse  | 1.60 | 0.0 |  |  |  |
| P227627 | chr19_6849812:6850812_mouse     | 1.70 | 0.0 |  |  |  |
| P227635 | chr15_102886875:102887875_mouse | 1.42 | 0.0 |  |  |  |
| P227677 | chr14_107902391:107903391_mouse | 1.52 | 0.0 |  |  |  |
| P227730 | chr4_152600769:152601769_mouse  | 1.48 | 0.0 |  |  |  |
| P227769 | chr8_108880115:108881115_mouse  | 1.82 | 0.0 |  |  |  |
| P227787 | chr11_48495625:48496625_mouse   | 1.74 | 1.7 |  |  |  |

**Supplementary Table 2.** Biochemical pathways as Foxa2 targets in the liver.

The DAVID 2007 suite of software, including the EASE analysis tool, was used to determine enriched GO Biological Functional Categories in the set of 574 promoter/enhancer regions bound by Foxa2 by location analysis. Each notable category associated with steroid and lipid metabolism is listed with its EASE score, a statistical measure corresponding to the probability that the category is over-represented in the target list compared to all the genes represented on the two enhancer/promoter array used in the location analysis.

| System                | Category                   | EASE Score  |
|-----------------------|----------------------------|-------------|
| GO Biological Process | Steroid Biosynthesis       | 0.00187     |
| GO Biological Process | Steroid Metabolism         | 0.000493    |
| GO Molecular Function | Lipid Biosynthesis         | 0.00410     |
| GO Biological Process | Lipid Metabolism           | 0.000000549 |
| GO Biological Process | Lipid Transporter Activity | 0.00308     |



**Supplementary Table 3.** Clinical parameters for control and cholestatic patients

| <b>Patient</b> | <b>Diagnosis</b>                      | <b>Age (months)</b> | <b>Total bilirubin (mg/dL)</b> | <b>Conjugated bilirubin (mg/dL)</b> | <b>ALP (U/L)</b> | <b>GGT (U/L)</b> | <b>ALT (U/L)</b> | <b>AST (U/L)</b> | <b>Albumin (g/dL)</b> |
|----------------|---------------------------------------|---------------------|--------------------------------|-------------------------------------|------------------|------------------|------------------|------------------|-----------------------|
| Control 1      | Hepatitis B Virus                     | 179                 | 11.7                           | 6                                   | 289              | 57               | 801              | 1399             | 2.3                   |
| Control 2      | Ornithine transcarbamylase deficiency | 13                  | 0                              | 0                                   | 140              | N/A              | 9                | 32               | 3.2                   |
| Control 3      | Citrullinemia                         | 11                  | 0.6                            | 0                                   | 127              | 23               | 85               | 83               | 3.5                   |
| Control 4      | Citrullinemia                         | 16                  | 0.1                            | 0                                   | 301              | 27               | 103              | 52               | 3.6                   |
| Control 5      | Joubert syndrome                      | 124                 | 7.1                            | 12.9                                | 1149             | 1074             | 351              | 298              | 3.5                   |
| Control 6      | Steatosis                             | Adult               | 0.6                            | N/A                                 | 61               | N/A              | 44               | 46               | N/A                   |
| Cholestatic 1  | Biliary atresia                       | 8                   | 6.5                            | 4.2                                 | 890              | 614              | 101              | 142              | 3.4                   |
| Cholestatic 2  | Biliary atresia                       | 7                   | 14.2                           | 8                                   | 883              | 379              | 169              | 234              | 3.1                   |
| Cholestatic 3  | Biliary atresia                       | 25                  | 8.9                            | 4.8                                 | 882              | 364              | 336              | 334              | 3.8                   |
| Cholestatic 4  | Biliary atresia                       | 10                  | 13.9                           | 5.9                                 | 1015             | 194              | 225              | 343              | 3.3                   |
| Cholestatic 5  | Primary sclerosing cholangitis        | 137                 | 21.3                           | 5.6                                 | 511              | 55               | 366              | 1856             | 3.2                   |
| Cholestatic 6  | Primary sclerosing cholangitis        | 41                  | 7.5                            | 5.5                                 | 612              | 121              | 120              | 240              | 2.7                   |
| Cholestatic 7  | Primary sclerosing cholangitis        | Adult               | 15.7                           | 14                                  | 33               | 86               | 55               | 116              | N/A                   |
| Cholestatic 8  | Primary sclerosing cholangitis        | Adult               | 1.1                            | 0.7                                 | 769              | 318              | 71               | 52               | N/A                   |

## **Supplementary Methods**

*Glutathione Assay.* Snap-frozen mouse liver (100 mg) was homogenized in 0.5 mL of 5% sulfosalicylic acid (SSA) using a Kontes glass homogenizer (2mL). After centrifugation at 13000 rpm for 10 min, the supernatant was transferred to a new tube and used for glutathione analysis. Total glutathione and oxidized GSSG content was determined using Bioxytech GSH/GSSG-412 kit (Oxis International, Inc.).

*Analysis of Overrepresented Functional Categories.* The Database for Annotation, Visualization and Integrated Discovery 2007, a bioinformatics tool provided by the National Center for Biotechnology Information (NCBI: <http://david.abcc.ncifcrf.gov/>), was utilized to determine functional biological categories in the set of 484 Foxa2 target genes. DAVID 2007 utilizes several annotation systems, including Gene Ontology categories, PIR, SwissProt keywords, and pathway maps to summarize the functional information in a large dataset. Functional categories are ranked based on co-occurrence probability, also known as the EASE-score, a metric detecting functional categories over-represented in the target list compared to all the genes represented on the array platform used.
